# Supplementary material for: Comprehensive Modeling and Discovery of Mebendazole as a Novel TRAF2- and NCK-interacting Kinase Inhibitor
Source: PubMed Central journal article supplement (PMC5030704; doi:10.1038/srep33534), 2016-09-21

**Discovery of Mebendazole as a novel TRAF2- and NCK-interacting kinase inhibitor**

Zhi Tan<sup>1,2, \*</sup>, Lu Chen<sup>1,2, \*</sup>, Shuxing Zhang<sup>1, 2,</sup>

<sup>1</sup>Integrated Molecular Discovery Laboratory, Department of Experimental Therapeutics, The University of Texas MD Anderson Cancer Center, Houston, TX 77030

<sup>2</sup>The University of Texas Graduate School of Biomedical Sciences, Houston, TX 77030, USA.

\*These authors contributed equally to this work.

Correspondence and requests for materials should be addressed to Shuxing Zhang, Ph.D.

Tel: +1-(713)745-2958

Fax: +1-(713)794-5577

Email: shuzhang@mdanderson.org

**Supplementary Table 1.** 72 kinase inhibitors and their type of binding mode. We used  $K_d = 100 \mu\text{M}$  to indicate the inactive compounds. The actives are shaded in yellow, and the inactives are shaded in blue.

| Compound               | Binding Mode | Alternative Name | $K_d$ to TNIK ( $\mu\text{M}$ ) | $pK_d$ to TNIK | PDB ID of reference structure |
|------------------------|--------------|------------------|---------------------------------|----------------|-------------------------------|
| A-674563               | Type I       |                  | 0.1400                          | 6.854          | 2UZT, 2UZW                    |
| AB-1010                | Type II      | Masitinib        | 100.0000                        | 4.000          |                               |
| ABT-869                | Type II      | Linifanib        | 2.8000                          | 5.553          |                               |
| AC220                  | Type II      | Quizartinib      | 2.8000                          | 5.553          |                               |
| AG-013736              | Type I       | Axitinib         | 0.1800                          | 6.745          | 4AG8                          |
| AMG-706                | Type II      | Motesanib        | 100.0000                        | 4.000          | 3EFL                          |
| AST-487                | Type II      |                  | 0.0690                          | 7.161          | 3UGC (similar)                |
| AT-7519                | Type I       |                  | 100.0000                        | 4.000          | 2VU3                          |
| AZD-1152HQPA           | Type II      |                  | 8.5000                          | 5.071          |                               |
| AZD-2171               | Type I       | Cediranib        | 0.8100                          | 6.092          |                               |
| AZD-6244/ARRY-886      | Allosteric   | Selumetinib      | 100.0000                        | 4.000          |                               |
| BI-2536                | Type I       |                  | 100.0000                        | 4.000          | 2RKU                          |
| BIBF-1120 (derivative) | Type I       |                  | 0.0530                          | 7.276          | 3C7Q                          |
| BIBW-2992              | Type I       | Afatinib         | 100.0000                        | 4.000          | 4G5J                          |
| BIRB-796               | Type II      | Doramapimod      | 0.1400                          | 6.854          | 1KV2                          |
| BMS-345541             | Type I       |                  | 100.0000                        | 4.000          |                               |
| BMS-387032/SNS-032     | Type I       |                  | 100.0000                        | 4.000          |                               |
| BMS-540215             | Type I       | Brivanib         | 0.1600                          | 6.796          |                               |
| CEP-701                | Type I       | Lestaurtinib     | 0.0054                          | 8.268          | 1R0P (similar)                |
| CHIR-258/TKI-258       | Type I       | Dovitinib        | 0.0240                          | 7.620          |                               |
| CHIR-265/RAF-265       | Type II      |                  | 1.5000                          | 5.824          |                               |
| CI-1033                | Type I       | Canertinib       | 8.2000                          | 5.086          | 2VRX (similar)                |
| CI-1040                | Allosteric   |                  | 100.0000                        | 4.000          | 3EQC                          |
| CP-690550              | Type I       | Tofacitinib      | 100.0000                        | 4.000          | 3LXK                          |
| Crizotinib             | Type I       |                  | 100.0000                        | 4.000          | 2YFX                          |
| Dasatinib              | Type I       |                  | 2.0000                          | 5.699          | 2Y6O, 3G5D                    |
| Erlotinib              | Type I       |                  | 4.5000                          | 5.347          | 1M17                          |
| EXEL-2880/GSK1363089   | Type II      | Foretinib        | 0.2100                          | 6.678          | 3LQ8                          |
| Flavopiridol           | Type I       | Alvocidib        | 100.0000                        | 4.000          | 3BLR                          |
| GDC-0879               | Type I       |                  | 2.3000                          | 5.638          | 3D4Q (similar)                |
| GDC-0941               | Type I       |                  | 100.0000                        | 4.000          | 2WXP                          |
| Gefitinib              | Type I       |                  | 6.9000                          | 5.161          | 3UG2                          |
| GSK-1838705A           | Type I       |                  | 100.0000                        | 4.000          | 3EKK (similar)                |
| GSK-461364A            | Type I       |                  | 100.0000                        | 4.000          | 2XNM (similar)                |
| GSK-690693             | Type I       |                  | 100.0000                        | 4.000          | 3D0E                          |
| GW-2580                | Type II      |                  | 100.0000                        | 4.000          | 4AT5                          |

|                |              |               |          |       |                |
|----------------|--------------|---------------|----------|-------|----------------|
| HKI-272        | Type I       | Neratinib     | 0.1400   | 6.854 | 3W2Q           |
| Imatinib       | Type II      |               | 100.0000 | 4.000 | 2HYY, 2PLO     |
| INCB18424      | Type I       | Ruxolitinib   | 100.0000 | 4.000 |                |
| JNJ-28312141   | Type I       |               | 0.1500   | 6.824 | 3KRJ           |
| Ki-20227       | Type II      |               | 2.3000   | 5.638 | 2RL2 (similar) |
| KW-2449        | Type I       |               | 0.0280   | 7.553 |                |
| Lapatinib      | Type I       |               | 100.0000 | 4.000 | 3BBT, 1XKK     |
| LY-317615      | Type I       | Enzastaurin   | 100.0000 | 4.000 | 1UU7 (similar) |
| LY-333531      | Type I       | Ruboxistaurin | 100.0000 | 4.000 | 1UU3           |
| MLN-120B       | Type I       |               | 100.0000 | 4.000 |                |
| MLN-518        | Type II      | Tandutinib    | 100.0000 | 4.000 |                |
| MLN-8054       | Type I       |               | 100.0000 | 4.000 | 2X81           |
| Nilotinib      | Type II      |               | 100.0000 | 4.000 | 3GP0           |
| Pazopanib      | Type I       |               | 0.3100   | 6.509 | 3CJG (similar) |
| PD-173955      | Type I       |               | 0.4300   | 6.367 | 1M52           |
| PHA-665752     | Type I       |               | 0.3100   | 6.509 | 2WKM           |
| PI-103         | Type I       |               | 100.0000 | 4.000 | 2X6K           |
| PKC-412        | Type I       | Midostaurin   | 1.6000   | 5.796 | 1AQ1 (similar) |
| PLX-4720       | Type I       |               | 2.5000   | 5.602 | 3C4C           |
| PP-242         | Type I       |               | 0.2700   | 6.569 | 3T3V (similar) |
| PTK-787        | undetermined | Vatalanib     | 100.0000 | 4.000 |                |
| R406           | Type I       | Tamatinib     | 1.3000   | 5.886 | 3FQS           |
| R547           | Type I       |               | 100.0000 | 4.000 | 2FVD           |
| SB-203580      | Type I       |               | 0.8200   | 6.086 | 3ZS5           |
| SGX-523        | Type I       |               | 100.0000 | 4.000 | 3DKG           |
| SKI-606        | Type I       | Bosutinib     | 0.0310   | 7.509 | 3UE4           |
| Sorafenib      | Type II      |               | 7.9000   | 5.102 | 3HEG           |
| Staurosporine  | Type I       |               | 0.0047   | 8.328 | 4ERW           |
| SU-14813       | Type I       |               | 0.0900   | 7.046 | 3G0E (similar) |
| Sunitinib      | Type I       |               | 0.0250   | 7.602 | 3G0E           |
| TAE-684        | Type I       |               | 1.2000   | 5.921 | 2XB7           |
| TG-100-115     | Type I       |               | 100.0000 | 4.000 |                |
| TG-101348      | Type I       |               | 100.0000 | 4.000 |                |
| Vandetanib     | Type I       |               | 2.3000   | 5.638 |                |
| VX-680/MK-0457 | Type I       | Tozasertib    | 1.8000   | 5.745 | 3E5A, 2XYN     |
| VX-745         | Type I       |               | 100.0000 | 4.000 | 3ZSI           |

**Supplementary Table 2.** Structural comparison indicated by CoMSIA fields.

| <b>Field(s)</b>                           | <b>Cmpd ID (pIC50)</b>                    | <b>Changes</b>                                                                                                |
|-------------------------------------------|-------------------------------------------|---------------------------------------------------------------------------------------------------------------|
| S4 & E5                                   | 4 ( <b>8.00</b> ) → A46 ( <b>7.80</b> )   | 4-H → 4-OMe                                                                                                   |
|                                           | A47 ( <b>8.52</b> ) → 4 ( <b>8.00</b> )   | 4-pyridine → Phe                                                                                              |
|                                           | A47 ( <b>8.52</b> ) → A69 ( <b>8.15</b> ) | 4-pyridine → 5-pyrimidine                                                                                     |
|                                           | 1 ( <b>8.05</b> ) → 10 ( <b>7.85</b> )    | 4-H → 4-Me                                                                                                    |
|                                           | 1 ( <b>8.05</b> ) → A11 ( <b>7.85</b> )   | 4-H → 4-OMe                                                                                                   |
|                                           | A11 ( <b>7.85</b> ) → A12 ( <b>7.62</b> ) | 4-OMe → 4-NH <sub>2</sub>                                                                                     |
|                                           | A84 ( <b>8.70</b> ) → A55 ( <b>8.00</b> ) | 3-pyridine → Phe-4-OMe                                                                                        |
|                                           | A72 ( <b>8.40</b> ) → A23 ( <b>8.00</b> ) | 3-pyridine → Phe-4-OMe                                                                                        |
|                                           | A74 ( <b>8.15</b> ) → A22 ( <b>7.82</b> ) | 3-pyridine → Phe-4-OMe                                                                                        |
| S3, E3, H2 & H3                           | 9 ( <b>7.17</b> ) → 11 ( <b>5.77</b> )    | 2-F → 2-Cl                                                                                                    |
|                                           | 9 ( <b>7.17</b> ) → 13 ( <b>6.74</b> )    | 2-F → 2,6-diF                                                                                                 |
|                                           | 9 ( <b>7.17</b> ) → 12 ( <b>5.77</b> )    | 2-F → 3-Br                                                                                                    |
|                                           | A103 ( <b>8.00</b> ) → 14 ( <b>7.24</b> ) | 3,4-di-NH <sub>2</sub> → 3,4-di-OMe                                                                           |
|                                           | 12 ( <b>5.77</b> ) → 5 ( <b>5.11</b> )    | 3-Br → 3-OMe                                                                                                  |
| S2 & H1                                   | A23 ( <b>8.10</b> ) → A37 ( <b>8.05</b> ) | 4-NHCH <sub>2</sub> CH <sub>2</sub> OH → 4-NHCOCH <sub>2</sub> OH                                             |
|                                           | A47 ( <b>8.52</b> ) → A76 ( <b>8.15</b> ) | 4-OMe → 4-F                                                                                                   |
|                                           | A27 ( <b>8.05</b> ) → A42 ( <b>7.74</b> ) | 4-NH(CH <sub>2</sub> ) <sub>2</sub> -morpholine → 4-NHCOCH <sub>2</sub> -N-methylpiperazine                   |
|                                           | E1                                        | A37 ( <b>8.05</b> ) → A11 ( <b>7.85</b> )                                                                     |
| A23 ( <b>8.10</b> ) → A24 ( <b>7.96</b> ) |                                           | 4-NH(CH <sub>2</sub> ) <sub>2</sub> OH → 4-NH(CH <sub>2</sub> ) <sub>2</sub> N(CH <sub>3</sub> ) <sub>2</sub> |
| E4 & H4                                   | 15 ( <b>7.51</b> ) → 6 ( <b>6.55</b> )    | 2-thiophene → CH <sub>2</sub> -2-thiophene                                                                    |
|                                           | 15 ( <b>7.51</b> ) → 16 ( <b>5.39</b> )   | 2-thiophene → CH(Et) <sub>2</sub>                                                                             |
| S1                                        | A49 ( <b>8.30</b> ) → A27 ( <b>8.05</b> ) | 4-NH(CH <sub>2</sub> ) <sub>2</sub> -piperidine → 4-NH(CH <sub>2</sub> ) <sub>2</sub> -morpholine             |
|                                           | A49 ( <b>8.30</b> ) → A55 ( <b>8.00</b> ) | 4-NH(CH <sub>2</sub> ) <sub>2</sub> -piperidine → 4-NH(CH <sub>2</sub> ) <sub>2</sub> -4-pyridine             |
|                                           | A49 ( <b>8.30</b> ) → A42 ( <b>7.74</b> ) | 4-NH(CH <sub>2</sub> ) <sub>2</sub> -piperidine → 4-NHCOCH <sub>2</sub> -N-methylpiperazine                   |

**Supplementary Table 3.** Details of the data splitting and predictions for the CoMSIA model.

The predicted  $pIC_{50}$ s for the training set are the LOO cross-validated values.

| Training set |                         |                      |                                  | Test set |                         |                      |                                  |
|--------------|-------------------------|----------------------|----------------------------------|----------|-------------------------|----------------------|----------------------------------|
| ID           | Predicted<br>$pIC_{50}$ | Actual<br>$pIC_{50}$ | Predicted – Actual<br>$pIC_{50}$ | ID       | Predicted<br>$pIC_{50}$ | Actual<br>$pIC_{50}$ | Predicted – Actual<br>$pIC_{50}$ |
| 2            | 7.178                   | 7.400                | -0.222                           | 1        | 8.010                   | 8.050                | -0.040                           |
| 3            | 7.778                   | 7.720                | 0.058                            | 5        | 7.977                   | 5.110                | 2.867                            |
| 4            | 7.985                   | 8.000                | -0.015                           | 6        | 6.837                   | 6.550                | 0.287                            |
| 7            | 6.824                   | 6.740                | 0.084                            | 9        | 7.374                   | 7.170                | 0.204                            |
| 8            | 6.564                   | 6.890                | -0.326                           | A2       | 7.608                   | 7.770                | -0.162                           |
| 10           | 7.251                   | 7.850                | -0.599                           | A20      | 7.891                   | 8.050                | -0.159                           |
| 11           | 6.628                   | 5.770                | 0.858                            | A29      | 7.653                   | 8.100                | -0.447                           |
| 12           | 6.733                   | 5.770                | 0.963                            | A46      | 7.738                   | 7.800                | -0.062                           |
| 13           | 6.500                   | 6.740                | -0.240                           | A72      | 8.732                   | 8.400                | 0.332                            |
| 14           | 7.522                   | 7.240                | 0.282                            |          |                         |                      |                                  |
| 15           | 6.793                   | 7.510                | -0.717                           |          |                         |                      |                                  |
| 16           | 6.147                   | 5.390                | 0.757                            |          |                         |                      |                                  |
| 17           | 6.545                   | 5.510                | 1.035                            |          |                         |                      |                                  |
| A1           | 7.703                   | 8.220                | -0.517                           |          |                         |                      |                                  |
| A4           | 8.118                   | 7.740                | 0.378                            |          |                         |                      |                                  |
| A9           | 8.129                   | 7.740                | 0.389                            |          |                         |                      |                                  |
| A11          | 7.567                   | 7.850                | -0.283                           |          |                         |                      |                                  |
| A19          | 8.405                   | 7.620                | 0.785                            |          |                         |                      |                                  |
| A22          | 8.013                   | 7.820                | 0.193                            |          |                         |                      |                                  |
| A23          | 7.996                   | 8.100                | -0.104                           |          |                         |                      |                                  |
| A24          | 7.909                   | 7.960                | -0.051                           |          |                         |                      |                                  |
| A27          | 8.281                   | 8.050                | 0.231                            |          |                         |                      |                                  |
| A31          | 8.057                   | 8.000                | 0.057                            |          |                         |                      |                                  |
| A37          | 7.646                   | 8.050                | -0.404                           |          |                         |                      |                                  |
| A42          | 7.496                   | 7.740                | -0.244                           |          |                         |                      |                                  |
| A43          | 8.224                   | 7.890                | 0.334                            |          |                         |                      |                                  |
| A44          | 7.838                   | 7.960                | -0.122                           |          |                         |                      |                                  |
| A45          | 8.114                   | 7.660                | 0.454                            |          |                         |                      |                                  |
| A47          | 8.610                   | 8.520                | 0.090                            |          |                         |                      |                                  |
| A48          | 7.689                   | 8.220                | -0.531                           |          |                         |                      |                                  |
| A49          | 7.953                   | 8.300                | -0.347                           |          |                         |                      |                                  |
| A55          | 8.214                   | 8.000                | 0.214                            |          |                         |                      |                                  |
| A69          | 8.619                   | 8.150                | 0.469                            |          |                         |                      |                                  |
| A74          | 7.700                   | 8.150                | -0.450                           |          |                         |                      |                                  |
| A76          | 7.877                   | 8.150                | -0.273                           |          |                         |                      |                                  |
| A84          | 8.360                   | 8.700                | -0.340                           |          |                         |                      |                                  |
| A92          | 8.382                   | 8.520                | -0.138                           |          |                         |                      |                                  |
| A102         | 7.532                   | 8.220                | -0.688                           |          |                         |                      |                                  |
| A103         | 8.162                   | 8.000                | 0.162                            |          |                         |                      |                                  |

**Supplementary Table 4.** Details of the data splitting and predictions for kNN model 1. The predicted  $pIC_{50}$ s for the training set are the LOO cross-validated values.

| Training set |                                       |                                    |                                                | Test set |                                       |                                    |                                                |
|--------------|---------------------------------------|------------------------------------|------------------------------------------------|----------|---------------------------------------|------------------------------------|------------------------------------------------|
| ID           | Predicted<br><i>pIC</i> <sub>50</sub> | Actual<br><i>pIC</i> <sub>50</sub> | Predicted – Actual<br><i>pIC</i> <sub>50</sub> | ID       | Predicted<br><i>pIC</i> <sub>50</sub> | Actual<br><i>pIC</i> <sub>50</sub> | Predicted – Actual<br><i>pIC</i> <sub>50</sub> |
| 2            | 7.398                                 | 7.669                              | -0.271                                         | 1        | 8.030                                 | 8.046                              | -0.016                                         |
| 4            | 8.000                                 | 8.285                              | -0.285                                         | 3        | 7.646                                 | 7.721                              | -0.075                                         |
| 7            | 6.745                                 | 7.453                              | -0.709                                         | 5        | 6.129                                 | 5.114                              | 1.015                                          |
| 9            | 7.167                                 | 7.468                              | -0.301                                         | 6        | 6.297                                 | 6.553                              | -0.256                                         |
| 11           | 5.770                                 | 6.045                              | -0.275                                         | 8        | 6.252                                 | 6.886                              | -0.634                                         |
| 13           | 6.745                                 | 7.323                              | -0.578                                         | 10       | 7.889                                 | 7.854                              | 0.035                                          |
| 15           | 7.509                                 | 7.258                              | 0.250                                          | 12       | 5.429                                 | 5.770                              | -0.341                                         |
| 16           | 5.387                                 | 5.650                              | -0.262                                         | 14       | 7.953                                 | 7.244                              | 0.709                                          |
| 17           | 5.509                                 | 5.545                              | -0.037                                         | A1       | 7.522                                 | 8.222                              | -0.700                                         |
| A2           | 7.770                                 | 7.438                              | 0.332                                          | A4       | 7.845                                 | 7.745                              | 0.100                                          |
| A11          | 7.854                                 | 7.981                              | -0.127                                         | A9       | 8.028                                 | 7.745                              | 0.283                                          |
| A19          | 7.620                                 | 8.075                              | -0.455                                         | A23      | 8.445                                 | 8.097                              | 0.348                                          |
| A20          | 8.046                                 | 8.072                              | -0.027                                         | A24      | 8.007                                 | 7.959                              | 0.048                                          |
| A22          | 7.824                                 | 8.218                              | -0.394                                         | A29      | 8.173                                 | 8.097                              | 0.076                                          |
| A27          | 8.046                                 | 8.116                              | -0.070                                         | A37      | 8.435                                 | 8.046                              | 0.389                                          |
| A31          | 8.000                                 | 8.369                              | -0.369                                         | A44      | 8.173                                 | 7.959                              | 0.214                                          |
| A42          | 7.745                                 | 8.173                              | -0.429                                         | A45      | 8.173                                 | 7.658                              | 0.515                                          |
| A43          | 7.886                                 | 8.000                              | -0.114                                         | A46      | 8.099                                 | 7.796                              | 0.303                                          |
| A47          | 8.523                                 | 8.077                              | 0.445                                          | A72      | 8.045                                 | 8.398                              | -0.353                                         |
| A48          | 8.222                                 | 7.945                              | 0.277                                          | A92      | 8.315                                 | 8.523                              | -0.208                                         |
| A49          | 8.301                                 | 7.945                              | 0.356                                          | A103     | 8.021                                 | 8.000                              | 0.021                                          |
| A55          | 8.000                                 | 7.925                              | 0.075                                          |          |                                       |                                    |                                                |
| A69          | 8.155                                 | 8.185                              | -0.030                                         |          |                                       |                                    |                                                |
| A74          | 8.155                                 | 8.005                              | 0.150                                          |          |                                       |                                    |                                                |
| A76          | 8.155                                 | 7.586                              | 0.569                                          |          |                                       |                                    |                                                |
| A84          | 8.699                                 | 7.956                              | 0.743                                          |          |                                       |                                    |                                                |
| A102         | 8.222                                 | 7.737                              | 0.485                                          |          |                                       |                                    |                                                |

**Supplementary Table 5.** Details of the data splitting and predictions for the CoMSIA-SIMCA model. The predicted classes of  $pK_d$ s for the training set are the five-group cross-validated values.

| <b>Training set</b> |                  |               | <b>Test set</b> |                  |               |
|---------------------|------------------|---------------|-----------------|------------------|---------------|
| ID                  | Predicted $pK_d$ | Actual $pK_d$ | ID              | Predicted $pK_d$ | Actual $pK_d$ |
| A-674563            | 6                | 6             | AT-7519         | 4                | 4             |
| AG-013736           | 6                | 6             | AZD-2171        | 5                | 6             |
| BI-2536             | 4                | 4             | Flavopiridol    | 4                | 4             |
| BIBW-2992           | 5                | 4             | Gefitinib       | 5                | 5             |
| BMS-345541          | 4                | 4             | Sunitinib       | 7                | 7             |
| BMS-387032          | 4                | 4             | Vandetanib      | 5                | 5             |
| BMS-540215          | 6                | 6             |                 |                  |               |
| BIBF-1120           | 7                | 7             |                 |                  |               |
| CEP-701             | 7                | 7             |                 |                  |               |
| CHIR-258            | 7                | 7             |                 |                  |               |
| CI-1033             | 5                | 5             |                 |                  |               |
| CP-690550           | 4                | 4             |                 |                  |               |
| Crizotinib          | 4                | 4             |                 |                  |               |
| Dasatinib           | 5                | 5             |                 |                  |               |
| Erlotinib           | 5                | 5             |                 |                  |               |
| GDC-0879            | 5                | 5             |                 |                  |               |
| GDC-0941            | 4                | 4             |                 |                  |               |
| GSK-1838705A        | 4                | 4             |                 |                  |               |
| GSK-461364A         | 4                | 4             |                 |                  |               |
| GSK-690693          | 4                | 4             |                 |                  |               |
| HKI-272             | 6                | 6             |                 |                  |               |
| INCB18424           | 4                | 4             |                 |                  |               |
| JNJ-28312141        | 6                | 6             |                 |                  |               |
| KW-2449             | 7                | 7             |                 |                  |               |
| Lapatinib           | 4                | 4             |                 |                  |               |
| LY-317615           | 4                | 4             |                 |                  |               |
| LY-333531           | 4                | 4             |                 |                  |               |
| MLN-120B            | 4                | 4             |                 |                  |               |
| MLN-8054            | 4                | 4             |                 |                  |               |
| Pazopanib           | 6                | 6             |                 |                  |               |
| PHA-665752          | 6                | 6             |                 |                  |               |
| PD-173955           | 6                | 6             |                 |                  |               |
| PI-103              | 4                | 4             |                 |                  |               |
| PKC-412             | 5                | 5             |                 |                  |               |
| PLX-4720            | 5                | 5             |                 |                  |               |
| PP-242              | 6                | 6             |                 |                  |               |
| R406                | 5                | 5             |                 |                  |               |
| R547                | 4                | 4             |                 |                  |               |
| SB-203580           | 5                | 6             |                 |                  |               |
| SGX-523             | 4                | 4             |                 |                  |               |

|               |   |   |
|---------------|---|---|
| SKI-606       | 6 | 7 |
| Staurosporine | 7 | 7 |
| SU-14813      | 7 | 7 |
| TAE-684       | 6 | 5 |
| TG-100-115    | 4 | 4 |
| TG-101348     | 4 | 4 |
| VX-680        | 5 | 5 |
| VX-745        | 4 | 4 |

---



**Supplementary Figure 1.** Correlation between pIC50 and KierA2 or PEOE\_VSA\_HYD for the molecules with radius below 7.

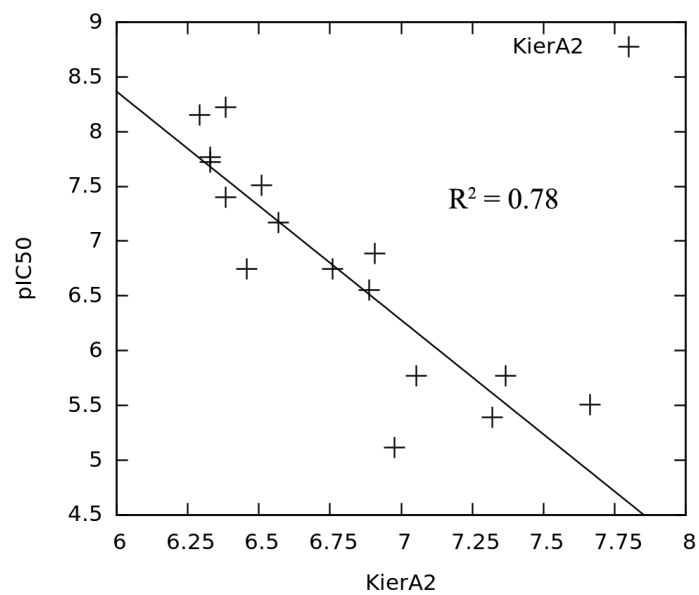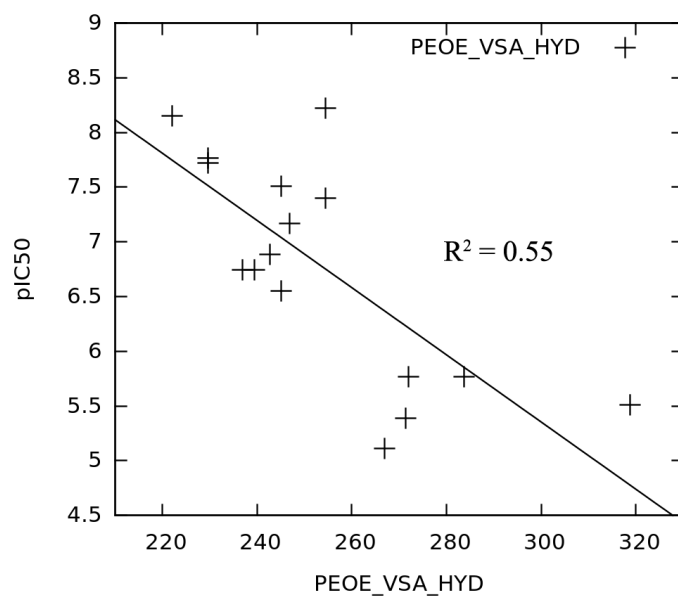

Supplement: srep33534-s1.pdf [file srep33534-s1.pdf]
